# Supplementary material
Source: Springer Nature journal article supplement (https://www.springermedizin.de/resource/supplementary/12877_2012_919_MOESM2_ESM.pdf/9440400)

### EQ VAS score depending on awareness of osteoporosis diagnosis

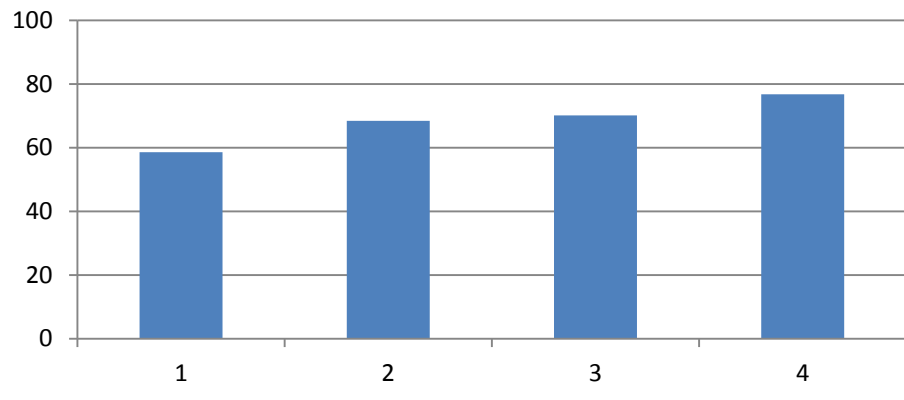

Supplement: MOESM2 [file 9440400]
